# Supplementary material for: Transcriptome Analysis Provides Insights into Hepatic Responses to Trichloroisocyanuric Acid Exposure in Goldfish (Carassius auratus)
Source: MDPI journal article supplement (doi:10.3390/ani11102775), 2021-09-23
Supplement: s1 [file s1]

## Supplementary material S1

Transcriptome analysis provides insights into hepatic responses to trichloroisocyanuric acid exposure in goldfish (*Carassius auratus*)

Shun Zhou<sup>1,2</sup>, Jing Dong<sup>1,2</sup>, Yongtao Liu<sup>1,2</sup>, Qihong Yang<sup>1,2</sup>, Ning Xu<sup>1,2</sup>, Yibin Yang<sup>1,2</sup>, Xiaohui Ai<sup>1,2\*</sup>

<sup>1</sup> Yangtze River Fisheries Research Institute, Chinese Academy of Fishery Sciences, Wuhan, 430223, China

<sup>2</sup> Hu Bei Province Engineering and Technology Research Center of Aquatic Product Quality and Safety, Wuhan, 430223, China

\* Author for correspondence: Xiaohui Ai,

Yangtze River Fisheries Research Institute, Chinese Academy of Fishery Sciences,

No. 8 Wuda Park Road 1, Wuhan 430223, Hubei Province, China

E-mail address: [aixh@yfi.ac.cn](mailto:aixh@yfi.ac.cn)

**Table S1.** The primers used in the quantitative PCR analysis.

| Name        | Forward primers (5'-3') | Reverse primers (5'-3')   |
|-------------|-------------------------|---------------------------|
| L-LDH       | GGTGAAGGTGAGCGGAGTTT    | GCCCTGCAGAAGACACCATA      |
| PK          | GGTGCATCATGGGTGATTCTG   | CGCTGCAACACACTCAACATC     |
| ATP-PFK     | ACGCCGTCTAGTGATCATGT    | ATTCCTATCGAACGGAGTGGG     |
| GST         | TAAAGGCTCGTACCTCGCTG    | GCTGACCTGAATGTGTTATGAGG   |
| UGT         | ATCACTCATGGTGGAACGCA    | CATCAAACCTCTCACCTGCCGT    |
| CYP2U1      | GCCAGTGGTGGAATCCTTGA    | TGGCATCGTGCTGTGTGATA      |
| SQE         | GACAGTACGGCACCTCAACA    | TGTCACCTTACTGTCCGGTCGC    |
| Delta 14-SR | GTTGGTATCAGGGTGGTGGG    | ACATGAATGAATAGTGCTACTGTGA |
| FACL4       | GATCTGCAACCACCCGGTTA    | TCACCAACAAACCTTGCTGC      |
| ACD         | GTATTTTCGTCCCTGCCCTCC   | AGAACATCAGACGTACCGATAGC   |
| β-actin     | GATGATGAAATTGCCGCACTG   | ACCGACCATGACGCCCTGATGT    |

Abbreviations: L-LDH, L-lactate dehydrogenase; PK, pyruvate kinase PKM; ATP-PFK, ATP-dependent 6-phosphofructokinase, muscle type-like; GST, glutathione S-transferase; UGT UDP-glucuronosyltransferase 1-5-like; CYP2U1, cytochrome P450 2U1; SQE, squalene monooxygenase-like; Delta 14-SR, delta(14)-sterol reductase-like; FACL4, long-chain-fatty-acid--CoA ligase 4-like isoform X1; ACD, acyl-CoA desaturase-like.

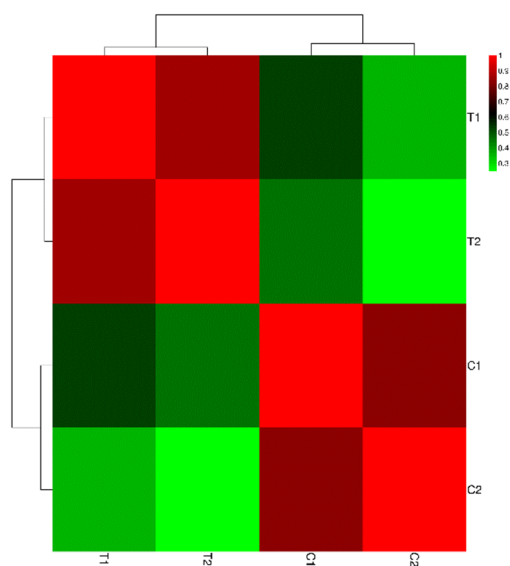

**Figure S1.** Heatmap of Pearson correlation between samples. Both X and Y-axis represent each sample. Coloring indicates Pearson correlation. C1 and C2 represent the control samples, T1 and T2 represent the samples treated with 0.81 mg/L trichloroisocyanuric acid.

**Table S2.** Summary statistics of the transcriptome sequences. C: 0 mg/L trichloroisocyanuric acid; T: 0.81 mg/L trichloroisocyanuric acid.

| Sample | Clean reads | Clean bases   | GC content (%) | Q30 (%) | Total Mapped reads (ratio) | Multiple mapped reads (ratio) | Uniquely mapped reads (ratio) |
|--------|-------------|---------------|----------------|---------|----------------------------|-------------------------------|-------------------------------|
| C1     | 20,774,117  | 6,222,361,568 | 45.64%         | 95.01%  | 36,279,169 (87.32%)        | 32,522,911 (78.28%)           | 3,756,258 (9.04%)             |
| C2     | 26,822,598  | 8,027,048,978 | 45.75%         | 95.95%  | 44,855,638 (83.62%)        | 39,772,028 (74.14%)           | 5,083,610 (9.48%)             |
| T1     | 25,491,795  | 7,632,550,880 | 46.27%         | 95.93%  | 43,445,910 (85.22%)        | 39,885,362 (78.23%)           | 3,560,548 (6.98%)             |
| T2     | 21,099,759  | 6,313,811,726 | 46.70%         | 95.85%  | 37,238,257 (88.24%)        | 34,152,239 (80.93%)           | 3,086,018 (7.31%)             |

**Table S3.** Representative energy metabolism-related pathways and differentially expressed genes in goldfish after treatment with trichloroisocyanuric acid.

| Gene ID                                         | Gene description                                                                 | Change | log2FoldChange | FDR       |
|-------------------------------------------------|----------------------------------------------------------------------------------|--------|----------------|-----------|
| <b>Glycolysis/Gluconeogenesis</b>               |                                                                                  |        |                |           |
| gene-aldh2                                      | aldehyde dehydrogenase, mitochondrial-like                                       | up     | 2.04           | 8.83E-05  |
| gene-LOC113048028                               | L-lactate dehydrogenase                                                          | up     | 3.58           | 3.09E-08  |
| gene-LOC113065773                               | enolase-like                                                                     | up     | 2.23           | 2.51E-05  |
| gene-LOC113048782                               | pyruvate dehydrogenase E1 component subunit alpha, mitochondrial-like isoform X1 | down   | -6.90          | 2.02E-36  |
| gene-LOC113048182                               | L-lactate dehydrogenase                                                          | up     | 2.85           | 0.0027965 |
| gene-LOC113057076                               | alcohol dehydrogenase class-3                                                    | up     | 4.12           | 1.13E-08  |
| gene-LOC113072161                               | alcohol dehydrogenase class-3-like isoform X4                                    | up     | 4.58           | 4.08E-08  |
| gene-LOC113107227                               | 4-trimethylaminobutyraldehyde dehydrogenase A-like                               | up     | 4.03           | 1.28E-10  |
| Carassius_auratus_newGene_9683                  | acetyl-coenzyme A synthetase 2-like, mitochondrial isoform X1                    | down   | -4.04          | 1.06E-06  |
| gene-LOC113059429                               | pyruvate kinase PKM                                                              | up     | 3.01           | 9.18E-05  |
| gene-LOC113113586                               | aldolase class-1 protein                                                         | up     | 2.53           | 0.0016387 |
| gene-LOC113081964                               | phosphoenolpyruvate carboxykinase-like: cytosolic [GTP] isoform X1               | down   | -4.10          | 1.79E-11  |
| gene-LOC113113588                               | aldolase class-1 protein                                                         | up     | 3.02           | 3.67E-08  |
| gene-LOC113111269                               | ATP-dependent 6-phosphofructokinase, muscle type-like                            | up     | 3.04           | 3.30E-08  |
| gene-LOC113117432                               | acetyl-coenzyme A synthetase 2-like, mitochondrial isoform X4                    | down   | -2.80          | 6.15E-08  |
| gene-LOC113070452                               | fructose-1,6-bisphosphatase 1                                                    | up     | 2.20           | 2.04E-05  |
| gene-LOC113112835                               | alcohol dehydrogenase class-3                                                    | up     | 3.35           | 5.34E-11  |
| <b>Propanoate metabolism</b>                    |                                                                                  |        |                |           |
| gene-ehhadh                                     | peroxisomal bifunctional enzyme-like                                             | up     | 2.97           | 2.40E-06  |
| gene-LOC113048915                               | acetyl-CoA carboxylase-like isoform X2                                           | down   | -2.06          | 0.0040882 |
| gene-LOC113060523                               | methylmalonate-semialdehyde dehydrogenase [acylating], mitochondrial-like        | up     | 2.08           | 1.04E-07  |
| gene-LOC113093300                               | malonyl-CoA decarboxylase, mitochondrial-like                                    | up     | 3.48           | 0.0014967 |
| <b>Ascorbate and aldarate metabolism</b>        |                                                                                  |        |                |           |
| gene-LOC113050879                               | regucalcin-like                                                                  | up     | 5.20           | 1.20E-09  |
| gene-LOC113092184                               | regucalcin-like                                                                  | up     | 2.32           | 0.0011164 |
| <b>Glyoxylate and dicarboxylate metabolism</b>  |                                                                                  |        |                |           |
| gene-LOC113065564                               | citrate synthase, mitochondrial-like                                             | down   | -2.09          | 2.55E-05  |
| gene-LOC113050664                               | glutamine synthetase-like isoform X1                                             | down   | -2.26          | 1.02E-07  |
| gene-LOC113056249                               | glycerol-3-phosphate phosphatase-like                                            | down   | -3.07          | 1.15E-07  |
| <b>Pentose and glucuronate interconversions</b> |                                                                                  |        |                |           |
| Carassius_auratus_newGene_5907                  | UDP-glucuronosyltransferase 1-1-like                                             | up     | 2.16           | 0.0064339 |

|                               |                                                                             |      |       |           |
|-------------------------------|-----------------------------------------------------------------------------|------|-------|-----------|
| gene-LOC113076602             | glucose-fructose oxidoreductase domain-containing protein 1-like isoform X1 | down | -2.03 | 0.0028573 |
| gene-LOC113063794             | oxidoreductase, aldo/keto reductase family member protein                   | up   | 2.37  | 0.0004931 |
| gene-LOC113061555             | aldose reductase-like                                                       | up   | 2.37  | 0.0067061 |
| gene-LOC113117483             | UTP--glucose-1-phosphate uridylyltransferase-like isoform X1                | down | -2.10 | 3.66E-05  |
| gene-LOC113118076             | trans-1,2-dihydrobenzene-1,2-diol dehydrogenase-like                        | up   | 2.47  | 5.28E-07  |
| gene-LOC113118075             | trans-1,2-dihydrobenzene-1,2-diol dehydrogenase-like                        | up   | 2.20  | 1.47E-06  |
| gene-sord                     | sorbitol dehydrogenase-like                                                 | up   | 5.14  | 1.90E-23  |
| gene-LOC113055297             | UDP-glucuronosyltransferase 1-5-like                                        | up   | 3.63  | 1.23E-06  |
| <b>pyruvate metabolism</b>    |                                                                             |      |       |           |
| gene-LOC113069931             | 4-trimethylaminobutyraldehyde dehydrogenase-like                            | up   | 2.80  | 1.55E-08  |
| gene-LOC113080845             | glyoxylate reductase/hydroxypyruvate reductase-like                         | down | -2.67 | 2.40E-06  |
| <b>Steroid biosynthesis</b>   |                                                                             |      |       |           |
| gene-LOC113038855             | neurologin-4, X-linked                                                      | up   | 3.41  | 1.06E-06  |
| gene-LOC113079864             | delta(24)-sterol reductase-like                                             | down | -4.65 | 5.31E-28  |
| gene-LOC113062498             | lanosterol 14-alpha demethylase                                             | down | -3.97 | 5.31E-19  |
| gene-LOC113120553             | squalene synthase-like                                                      | down | -3.32 | 1.50E-05  |
| gene-LOC113113575             | sterol-4-alpha-carboxylate 3-dehydrogenase, decarboxylating-like            | down | -3.88 | 2.04E-08  |
| gene-LOC113121083             | delta(24)-sterol reductase-like                                             | down | -2.86 | 2.42E-07  |
| gene-lss                      | lanosterol synthase-like                                                    | down | -4.33 | 1.71E-19  |
| gene-dhcr7                    | 7-dehydrocholesterol reductase-like isoform X1                              | down | -2.96 | 1.27E-09  |
| gene-LOC113059233             | squalene monooxygenase-like                                                 | down | -4.87 | 8.48E-23  |
| gene-LOC113115850             | squalene monooxygenase-like                                                 | down | -2.54 | 0.0004226 |
| gene-LOC113068573             | squalene synthase-like                                                      | down | -2.23 | 0.0004751 |
| gene-LOC113073347             | squalene synthase-like                                                      | down | -2.76 | 0.0003244 |
| gene-LOC113063930             | neurologin-4, X-linked                                                      | up   | 3.13  | 2.13E-06  |
| gene-LOC113076135             | delta(14)-sterol reductase-like                                             | down | -2.16 | 0.000262  |
| gene-LOC113054335             | delta(14)-sterol reductase-like                                             | down | -3.45 | 4.98E-06  |
| gene-LOC113078828             | lathosterol oxidase                                                         | down | -2.49 | 3.25E-05  |
| gene-cbp                      | 3-beta-hydroxysteroid-Delta(8),Delta(7)-isomerase-like                      | down | -4.57 | 5.46E-25  |
| gene-LOC113113351             | sterol-4-alpha-carboxylate 3-dehydrogenase, decarboxylating-like            | down | -3.08 | 5.59E-06  |
| gene-LOC113062450             | lanosterol 14-alpha demethylase                                             | down | -4.00 | 2.44E-15  |
| <b>Fatty acid degradation</b> |                                                                             |      |       |           |
| gene-LOC113073480             | long-chain-fatty-acid--CoA ligase 4-like isoform X1                         | down | -3.89 | 1.29E-21  |
| gene-LOC113043584             | carnitine O-palmitoyltransferase 1, liver isoform-like isoform X2           | up   | 2.07  | 0.0083275 |
| gene-LOC113117377             | medium-chain specific acyl-CoA dehydrogenase, mitochondrial-like            | up   | 2.86  | 8.60E-07  |

|                                     |                                                                      |      |       |           |
|-------------------------------------|----------------------------------------------------------------------|------|-------|-----------|
| gene-LOC113110014                   | acetyl-CoA acetyltransferase,<br>mitochondrial-like                  | up   | 3.66  | 2.66E-22  |
| gene-LOC113062791                   | acetyl-CoA acetyltransferase,<br>cytosolic-like                      | down | -3.70 | 2.26E-07  |
| gene-LOC113049649                   | long-chain-fatty-acid--CoA ligase<br>ACSBG2-like isoform X3          | down | -3.32 | 0.0044905 |
| gene-LOC113120792                   | acetyl-CoA acetyltransferase,<br>cytosolic-like                      | down | -3.80 | 2.12E-17  |
| gene-LOC113067102                   | carnitine O-palmitoyltransferase 1,<br>liver isoform-like isoform X2 | up   | 3.21  | 0.000107  |
| <b>Steroid hormone biosynthesis</b> |                                                                      |      |       |           |
| Carassius_auratus_newGene_8844      | cytochrome P450 3A24-like                                            | up   | 2.40  | 9.35E-09  |
| gene-LOC113107162                   | catechol O-methyltransferase-like                                    | up   | 2.92  | 0.0069445 |
| gene-LOC113083757                   | cytochrome P450 3A24-like                                            | up   | 2.20  | 0.0004411 |
| gene-comtd1                         | catechol O-methyltransferase<br>domain-containing protein 1-like     | up   | 2.07  | 0.0022736 |
| gene-sts                            | sterol-sulfatase-like                                                | up   | 4.29  | 5.66E-29  |
| gene-LOC113100639                   | cytochrome P450 3A24-like                                            | up   | 2.24  | 7.13E-05  |
| gene-LOC113038900                   | cytochrome P450 3A24-like                                            | up   | 2.67  | 6.98E-08  |
| <b>Fatty acid metabolism</b>        |                                                                      |      |       |           |
| gene-LOC113111436                   | acyl-CoA desaturase-like                                             | down | -3.58 | 6.56E-06  |
| gene-LOC113077428                   | estradiol 17-beta-dehydrogenase<br>12-B-like                         | up   | 2.76  | 0.004865  |
| gene-LOC113111444                   | elongation of very long chain fatty<br>acids protein 6-like          | up   | 2.13  | 0.0001103 |
| gene-LOC113069873                   | elongation of very long chain fatty<br>acids protein 4-like          | up   | 2.46  | 0.0026433 |
| gene-LOC113106903                   | HSD17B4                                                              | up   | 2.32  | 1.02E-05  |

**Table S4.** Representative detoxification-related pathways and differentially expressed genes in goldfish after treatment with trichloroisocyanuric acid.

| Gene ID                                             | Gene description                                                            | Change | log2FoldChange | FDR      |
|-----------------------------------------------------|-----------------------------------------------------------------------------|--------|----------------|----------|
| <b>metabolism of xenobiotics by cytochrome P450</b> |                                                                             |        |                |          |
| gene-LOC113076602                                   | glucose-fructose oxidoreductase domain-containing protein 1-like isoform X1 | down   | -2.03          | 0.00286  |
| Carassius_auratus_newGene_7011                      | epoxide hydrolase 1-like                                                    | up     | 2.53           | 0.00087  |
| gene-LOC113119694                                   | glutathione S-transferase                                                   | up     | 3.42           | 0.0036   |
| gene-LOC113113088                                   | glutathione S-transferase A4-like                                           | up     | 3.58           | 1.57E-08 |
| gene-LOC113098224                                   | carbonyl reductase [NADPH] 1-like                                           | up     | 4.10           | 0.00031  |
| gene-LOC113057076                                   | alcohol dehydrogenase class-3                                               | up     | 4.12           | 1.13E-08 |
| gene-LOC113072161                                   | alcohol dehydrogenase class-3-like isoform X4                               | up     | 4.58           | 4.08E-08 |
| gene-LOC113056744                                   | epoxide hydrolase 1-like                                                    | up     | 2.37           | 0.00641  |
| gene-LOC113093931                                   | glutathione S-transferase                                                   | up     | 3.24           | 1.99E-05 |
| gene-LOC113056663                                   | microsomal glutathione S-transferase 3-like isoform X1                      | up     | 2.97           | 2.68E-06 |
| gene-LOC113092965                                   | microsomal glutathione S-transferase 3-like                                 | up     | 3.21           | 1.22E-11 |
| gene-LOC113088650                                   | glutathione S-transferase                                                   | up     | 3.06           | 8.22E-12 |
| gene-LOC113119695                                   | glutathione S-transferase A-like                                            | up     | 4.13           | 1.06E-17 |
| gene-LOC113119696                                   | glutathione S-transferase                                                   | up     | 4.12           | 2.29E-21 |
| gene-LOC113118076                                   | trans-1,2-dihydrobenzene-1,2-diol dehydrogenase-like                        | up     | 2.47           | 5.28E-07 |
| gene-LOC113118075                                   | trans-1,2-dihydrobenzene-1,2-diol dehydrogenase-like                        | up     | 2.20           | 1.47E-06 |
| gene-LOC113072529                                   | glutathione S-transferase theta-1-like isoform X2                           | up     | 2.08           | 0.0042   |
| gene-LOC113055297                                   | UDP-glucuronosyltransferase 1-5-like                                        | up     | 3.63           | 1.23E-06 |
| gene-LOC113112835                                   | alcohol dehydrogenase class-3                                               | up     | 3.35           | 5.34E-11 |
| gene-LOC113120712                                   | epoxide hydrolase 1-like                                                    | up     | 2.38           | 5.21E-05 |
| <b>drug metabolism-cytochrome P450</b>              |                                                                             |        |                |          |
| gene-LOC113105784                                   | flavin-containing monooxygenase FMO GS-OX5-like                             | up     | 3.47           | 4.67E-06 |
| gene-LOC113121145                                   | dimethylaniline monooxygenase [N-oxide-forming] 5-like                      | up     | 2.14           | 0.00033  |
| gene-LOC113108170                                   | amine oxidase [flavin-containing]-like isoform X1                           | up     | 2.93           | 3.75E-07 |
| <b>drug metabolism-other enzymes</b>                |                                                                             |        |                |          |
| gene-LOC113038039                                   | UMP-CMP kinase                                                              | down   | -2.23          | 4.58E-05 |
| gene-LOC113105628                                   | cytidine deaminase                                                          | up     | 3.78           | 0.00029  |
| gene-LOC113041190                                   | cytidine deaminase-like                                                     | down   | -3.70          | 0.00065  |
| gene-LOC113115806                                   | dihydropyrimidine dehydrogenase [NADP(+)]-like                              | up     | 2.35           | 6.26E-09 |
| <b>other detoxification-related DEGs</b>            |                                                                             |        |                |          |
| gene-LOC113108503                                   | cytochrome P450 27C1-like                                                   | up     | 2.64           | 0.00093  |
| gene-LOC113120976                                   | cytochrome P450 2J1-like                                                    | up     | 2.45           | 0.00014  |
| gene-LOC113077208                                   | cytochrome P450 2J6-like                                                    | down   | -6.74          | 9.90E-15 |



|                                |                                     |      |       |          |
|--------------------------------|-------------------------------------|------|-------|----------|
| gene-LOC113077392              | cytochrome P450 2U1-like isoform X1 | up   | 4.76  | 8.45E-06 |
| gene-LOC113053331              | cytochrome P450 27C1-like           | up   | 2.70  | 7.06E-07 |
| gene-LOC113051375              | cytochrome P450 2U1                 | up   | 2.71  | 0.00573  |
| gene-LOC113043250              | cytochrome P450 2J6-like            | up   | 3.21  | 8.47E-10 |
| gene-LOC113044178              | cytochrome P450 4V2-like isoform X1 | up   | 2.56  | 2.07E-08 |
| gene-LOC113062931              | cytochrome P450 2U1-like isoform X1 | up   | 4.97  | 1.84E-06 |
| gene-LOC113108126              | cytochrome P450 27C1-like           | up   | 2.40  | 0.00229  |
| Carassius_auratus_newGene_8844 | cytochrome P450 3A24-like           | up   | 2.40  | 9.35E-09 |
| gene-LOC113051604              | cytochrome P450 2C20-like           | up   | 5.75  | 1.34E-09 |
| gene-LOC113083757              | cytochrome P450 3A24-like           | up   | 2.20  | 0.00044  |
| gene-LOC113049886              | cytochrome P450 1A1-like            | up   | 2.32  | 0.0003   |
| gene-LOC113120974              | cytochrome P450 2J6-like            | up   | 2.13  | 9.20E-05 |
| gene-LOC113115411              | cytochrome P450 2C8                 | up   | 3.58  | 0.00014  |
| gene-LOC113041251              | cytochrome P450 2U1-like            | down | -2.03 | 0.00045  |
| gene-LOC113100639              | cytochrome P450 3A24-like           | up   | 2.24  | 7.13E-05 |
| gene-LOC113043248              | cytochrome P450 2J6-like            | up   | 2.34  | 0.00586  |
| gene-LOC113066727              | cytochrome P450 2J6-like            | up   | 3.10  | 5.34E-11 |
| gene-LOC113038900              | cytochrome P450 3A24-like           | up   | 2.67  | 6.98E-08 |
